# Supplementary material
Source: HighWire-hosted journal article supplement (https://bmjopen.bmj.com/content/8/10/e020099)
Supplement: inline-supplementary-material-2 [file inline-supplementary-material-2.pdf]

## Global-Rating Scale for Epidural Anesthesia

|                           | 1                                                                                       | 2 | 3                                                                           | 4 | 5                                                                                    |
|---------------------------|-----------------------------------------------------------------------------------------|---|-----------------------------------------------------------------------------|---|--------------------------------------------------------------------------------------|
| Preparation for procedure | Did not organize equipment well. Has to stop procedure frequently to prepare equipment. |   | Equipment generally organized. Occasionally has to stop and prepare items.  |   | All equipment neatly organized, prepared, and ready for use                          |
| Respect for tissue        | Frequently used unnecessary force on tissue or caused damage                            |   | Careful handling of tissue but occasionally caused inadvertent damage       |   | Consistently handled tissues appropriately with minimal damage                       |
| Time and motion           | Many unnecessary moves                                                                  |   | Efficient time/motion but some unnecessary moves                            |   | Clear economy of movement and maximum efficiency                                     |
| Instrument handling       | Repeatedly makes tentative or awkward moves with instruments                            |   | Competent use of instruments but occasionally appeared stiff or awkward     |   | Fluid moves with instruments and no awkwardness                                      |
| Flow of procedure         | Frequently stopped procedure and seemed unsure of next move                             |   | Demonstrated some forward planning with reasonable progression of procedure |   | Obviously planned course of procedure with effortless flow from one move to the next |
| Knowledge of procedure    | Deficient knowledge                                                                     |   | Knew all important steps of procedure                                       |   | Demonstrated familiarity with all aspects of procedure                               |
| Overall performance       | Very poor                                                                               |   | Competent                                                                   |   | Clearly superior                                                                     |

OVERALL, SHOULD THE CANDIDATE:      PASS      FAIL
